# Supplementary material for: Extracellular vesicles from anoxia preconditioned mesenchymal stem cells alleviate myocardial ischemia/reperfusion injury
Source: Aging (Albany NY). 2021 Feb 12;13(4):6156–70. doi: 10.18632/aging.202611 (PMC7950238; doi:10.18632/aging.202611)
Supplement: Supplementary Table 1 [file aging-13-202611-s001.xlsx]

## Sheet: output_score
Supplementary Table 1. The results of RNA-seq based on the differences between NC-EVs and Int-EVs.
GeneNames	value1	value2	log2(Fold_change)	log2(Fold_change) normalized	z-score	p-value	q-value(Benjamini et al. 1995)	q-value(Storey et al. 2003)	Signature(q-value(Storey et al. 2003) < 0.001)
mus-miR-24-3p	10262	26744	-1.3819	-1.06392	-68.7004	0	0	0	TRUE
mus-miR-451-5p	10289	5963	0.786993	1.10497	48.5353	0	0	0	TRUE
mus-miR-21-5p	102397	107310	-0.0676111	0.25037	46.0632	0	0	0	TRUE
mus-miR-23a-3p	11714	21605	-0.883131	-0.56515	-35.732	1.26066e-279	1.16927e-277	4.94914e-278	TRUE
mus-miR-27a-3p	10306	7720	0.416812	0.734793	34.4879	1.21946e-260	9.04843e-259	3.82992e-259	TRUE
mus-let-7f-5p	4405	2385	0.885153	1.20313	33.806	1.60725e-250	9.93814e-249	4.2065e-249	TRUE
mus-miR-191a-5p	5722	11361	-0.989498	-0.671517	-29.9342	7.07271e-197	3.74854e-195	1.58664e-195	TRUE
mus-miR-145-5p	968	3051	-1.6562	-1.33822	-27.3295	1.8939e-164	8.78298e-163	3.71756e-163	TRUE
mus-let-7c-5p	4723	3197	0.562985	0.880966	27.1244	5.07933e-162	2.09381e-160	8.86246e-161	TRUE
mus-miR-199a-3p	32502	48133	-0.566498	-0.248517	-25.5402	7.0528e-144	2.61659e-142	1.10752e-142	TRUE
mus-miR-126a-3p	2127	1112	0.935663	1.25364	24.2143	1.57345e-129	5.30681e-128	2.24621e-128	TRUE
mus-let-7b-5p	3348	2183	0.616987	0.934968	23.9771	4.82285e-127	1.49106e-125	6.31121e-126	TRUE
mus-let-7a-5p	2346	1513	0.632791	0.950772	20.3343	6.39927e-92	1.82625e-90	7.72996e-91	TRUE
mus-miR-22-3p	59056	80602	-0.448732	-0.130751	-18.4831	2.82513e-76	7.48661e-75	3.16885e-75	TRUE
mus-miR-1b	359	82	2.13029	2.44827	15.7689	5.091e-56	1.25917e-54	5.3297e-55	TRUE
mus-miR-34a-5p	6631	10501	-0.663228	-0.345247	-15.6621	2.74463e-55	6.3641e-54	2.69373e-54	TRUE
mus-miR-92a-3p	1218	782	0.639274	0.957255	14.7189	4.87241e-49	1.06333e-47	4.50075e-48	TRUE
mus-miR-16-5p	6289	6040	0.0582821	0.376263	14.6305	1.79562e-48	3.70097e-47	1.5665e-47	TRUE
mus-let-7d-5p	1948	1598	0.285726	0.603707	12.493	8.15563e-36	1.59249e-34	6.74053e-35	TRUE
mus-miR-214-3p	3906	6191	-0.664481	-0.3465	-12.0166	2.90857e-33	5.3954e-32	2.2837e-32	TRUE
mus-miR-26a-5p	6022	6061	-0.00931313	0.308668	11.8812	1.48234e-32	2.6188e-31	1.10846e-31	TRUE
mus-miR-29a-3p	4047	6267	-0.630922	-0.312941	-10.9844	4.5411e-28	7.65794e-27	3.24137e-27	TRUE
mus-miR-185-5p	532	1150	-1.11214	-0.794155	-10.9293	8.35016e-28	1.34692e-26	5.70108e-27	TRUE
mus-let-7i-5p	3763	3721	0.0161929	0.334174	10.095	5.81356e-24	8.9868e-23	3.80383e-23	TRUE
mus-miR-425-5p	245	621	-1.34181	-1.02383	-9.9454	2.64111e-23	3.91941e-22	1.65896e-22	TRUE
mus-miR-872-5p	899	1664	-0.888262	-0.570281	-9.81934	9.29537e-23	1.32638e-21	5.61414e-22	TRUE
mus-miR-30d-5p	788	579	0.444632	0.762613	9.75179	1.81249e-22	2.49049e-21	1.05415e-21	TRUE
mus-miR-130a-3p	1406	2340	-0.734912	-0.416931	-8.74859	2.16037e-18	2.86249e-17	1.2116e-17	TRUE
mus-miR-181c-5p	137	384	-1.48693	-1.16895	-8.70572	3.15569e-18	4.0371e-17	1.70878e-17	TRUE
mus-miR-182	255	583	-1.193	-0.875018	-8.45077	2.89382e-17	3.57869e-16	1.51475e-16	TRUE
mus-miR-196a-5p	998	842	0.24522	0.563201	8.39225	4.76931e-17	5.70779e-16	2.41593e-16	TRUE
mus-miR-199a-5p	215	509	-1.24333	-0.925348	-8.27738	1.25913e-16	1.4598e-15	6.17888e-16	TRUE
mus-miR-143-3p	24976	33208	-0.410988	-0.0930074	-8.04239	8.81019e-16	9.90478e-15	4.19239e-15	TRUE
mus-miR-146a-5p	2765	2790	-0.0129856	0.304995	7.9286	2.21629e-15	2.41836e-14	1.02362e-14	TRUE
mus-miR-133a-3p	182	88	1.04836	1.36634	7.55772	4.10188e-14	4.34799e-13	1.84037e-13	TRUE
mus-miR-676	96	274	-1.51307	-1.19509	-7.4837	7.22577e-14	7.44655e-13	3.1519e-13	TRUE
mus-miR-140-5p	233	133	0.808904	1.12688	7.3519	1.9541e-13	1.95938e-12	8.29347e-13	TRUE
mus-miR-10a-5p	494	374	0.401473	0.719454	7.33674	2.18862e-13	2.13678e-12	9.04434e-13	TRUE
mus-miR-3068-5p	239	517	-1.11315	-0.795173	-7.33235	2.26151e-13	2.15133e-12	9.10593e-13	TRUE
mus-miR-320-3p	883	776	0.186357	0.504338	7.14061	9.29181e-13	8.61815e-12	3.6478e-12	TRUE
mus-miR-29b-3p	296	595	-1.00729	-0.689311	-6.94565	3.76722e-12	3.40887e-11	1.44287e-11	TRUE
mus-miR-96-5p	126	309	-1.29418	-0.976202	-6.74297	1.55181e-11	1.37076e-10	5.80202e-11	TRUE
mus-miR-19b-3p	573	1001	-0.804835	-0.486854	-6.59276	4.31725e-11	3.72488e-10	1.57663e-10	TRUE
mus-miR-490-5p	7	61	-3.12338	-2.8054	-6.26959	3.61999e-10	3.05231e-09	1.29195e-09	TRUE
mus-miR-31a-5p	2173	2246	-0.0476698	0.270311	6.26271	3.78351e-10	3.1193e-09	1.3203e-09	TRUE
mus-miR-652-3p	731	1211	-0.728256	-0.410275	-6.1938	5.87307e-10	4.73676e-09	2.00492e-09	TRUE
mus-miR-155-5p	164	96	0.77259	1.09057	6.00654	1.89525e-09	1.49604e-08	6.33227e-09	TRUE
mus-miR-150-5p	105	48	1.12928	1.44726	5.99541	2.02974e-09	1.56882e-08	6.64033e-09	TRUE
mus-miR-224-5p	46	143	-1.63631	-1.31833	-5.83735	5.30375e-09	4.0157e-08	1.69972e-08	TRUE
mus-miR-675-5p	68	23	1.5639	1.88188	5.81833	5.94374e-09	4.41026e-08	1.86672e-08	TRUE
mus-miR-26b-5p	1736	1782	-0.0377304	0.280251	5.79036	7.02347e-09	5.10923e-08	2.16258e-08	TRUE
mus-miR-423-3p	435	759	-0.803084	-0.485103	-5.72062	1.06135e-08	7.57235e-08	3.20514e-08	TRUE
mus-let-7g-5p	2825	3039	-0.105346	0.212635	5.67847	1.35909e-08	9.51361e-08	4.02682e-08	TRUE
mus-miR-27b-3p	1529	1568	-0.0363372	0.281644	5.4585	4.80172e-08	3.29896e-07	1.39635e-07	TRUE
mus-miR-192-5p	66	173	-1.39023	-1.07225	-5.44975	5.04394e-08	3.40237e-07	1.44012e-07	TRUE
mus-miR-200a-3p	154	321	-1.05964	-0.741662	-5.43819	5.38232e-08	3.56579e-07	1.50929e-07	TRUE
mus-miR-872-3p	73	178	-1.28591	-0.967928	-5.08118	3.75099e-07	2.44143e-06	1.03338e-06	TRUE
mus-miR-23b-3p	706	1118	-0.66318	-0.345199	-5.06374	4.11117e-07	2.62973e-06	1.11308e-06	TRUE
mus-miR-30a-5p	191	136	0.489966	0.807947	5.04355	4.56973e-07	2.87351e-06	1.21627e-06	TRUE
mus-miR-542-5p	490	797	-0.701798	-0.383817	-4.72052	2.3524e-06	1.45457e-05	6.15672e-06	TRUE
mus-miR-126a-5p	93	54	0.784271	1.10225	4.56209	5.06477e-06	3.08038e-05	1.30383e-05	TRUE
mus-miR-125a-5p	319	274	0.219381	0.537362	4.54394	5.52129e-06	3.30387e-05	1.39842e-05	TRUE
mus-miR-301a-3p	192	355	-0.886713	-0.568732	-4.5191	6.21019e-06	3.65711e-05	1.54794e-05	TRUE
mus-miR-31a-3p	1006	1503	-0.579215	-0.261234	-4.5101	6.47959e-06	3.75614e-05	1.58986e-05	TRUE
mus-miR-375-3p	117	77	0.603578	0.921559	4.41437	1.01307e-05	5.78228e-05	2.44746e-05	TRUE
mus-miR-149-5p	296	504	-0.767827	-0.449846	-4.34832	1.37183e-05	7.71133e-05	3.26397e-05	TRUE
mus-miR-1839-5p	531	835	-0.653064	-0.335083	-4.25424	2.09763e-05	0.000116152	4.91636e-05	TRUE
mus-miR-374-5p	65	34	0.934905	1.25289	4.22338	2.40662e-05	0.000131302	5.55761e-05	TRUE
mus-miR-15a-5p	670	664	0.0129779	0.330959	4.20542	2.60602e-05	0.000140121	5.93089e-05	TRUE
mus-miR-152-3p	122	239	-0.970129	-0.652148	-4.19036	2.78512e-05	0.000147612	6.24794e-05	TRUE
mus-miR-7a-1-3p	12	49	-2.02975	-1.71177	-4.14408	3.41184e-05	0.000178281	7.54607e-05	TRUE
mus-miR-93-5p	2549	3522	-0.466464	-0.148483	-4.01013	6.06853e-05	0.000312698	0.000132355	TRUE
mus-miR-218a-5p	417	663	-0.668961	-0.35098	-3.9591	7.52343e-05	0.000382355	0.000161839	TRUE
mus-miR-410-3p	27	8	1.75489	2.07287	3.90678	9.35332e-05	0.00046893	0.000198483	TRUE
mus-miR-434-3p	33	12	1.45943	1.77741	3.89806	9.69652e-05	0.000479655	0.000203023	TRUE
mus-miR-98-5p	185	152	0.283454	0.601435	3.82963	0.000128338	0.000626494	0.000265176	TRUE
mus-miR-99a-5p	2421	2717	-0.166411	0.15157	3.7853	0.000153526	0.000739714	0.000313098	TRUE
mus-miR-369-3p	13	1	3.70044	4.01842	3.75119	0.000175994	0.000837101	0.000354319	TRUE
mus-miR-429	190	160	0.247928	0.565909	3.67436	0.000238445	0.00111978	0.00047397	TRUE
mus-miR-379-5p	34	14	1.28011	1.59809	3.66978	0.000242756	0.00112578	0.000476508	TRUE
mus-miR-193a-3p	124	95	0.384341	0.702322	3.59754	0.000321244	0.00147138	0.000617042	TRUE
mus-miR-29b-5p	11	0	4.45943	4.77741	3.59676	0.00032221	0.0014578	0.000617042	TRUE
mus-let-7e-5p	155	126	0.298844	0.616825	3.5854	0.000336567	0.00150442	0.000636772	TRUE
mus-miR-141-3p	34	84	-1.30485	-0.986874	-3.54695	0.000389715	0.00172124	0.000728548	TRUE
mus-miR-380-3p	16	3	2.41504	2.73302	3.53658	0.000405351	0.00176924	0.000748863	TRUE
mus-miR-30c-5p	61	129	-1.08049	-0.762509	-3.531	0.000413995	0.00178596	0.000755939	TRUE
mus-miR-29c-3p	52	114	-1.13245	-0.814469	-3.51373	0.000441863	0.00188427	0.000797551	TRUE
mus-miR-466c-5p	117	90	0.378512	0.696493	3.46899	0.000522412	0.00220244	0.000932225	TRUE
mus-miR-30e-5p	59	36	0.712718	1.0307	3.4401	0.000581502	0.00242401	0.00102601	FALSE
mus-miR-382-5p	17	4	2.08746	2.40544	3.39589	0.000684067	0.00281988	0.0011892	FALSE
mus-miR-181a-5p	2460	3352	-0.446364	-0.128383	-3.39387	0.000689136	0.00280955	0.0011892	FALSE
mus-miR-122-5p	75	51	0.556393	0.874374	3.38076	0.000722865	0.00291503	0.00123384	FALSE
mus-miR-10b-5p	353	341	0.0498964	0.367877	3.3701	0.000751411	0.00299756	0.00126878	FALSE
mus-miR-99b-5p	528	791	-0.58314	-0.265159	-3.31644	0.000911725	0.0035984	0.00152309	FALSE
mus-miR-450b-5p	161	276	-0.777608	-0.459627	-3.28152	0.00103249	0.00403214	0.00170668	FALSE
mus-miR-582-5p	17	49	-1.52725	-1.20927	-3.19392	0.00140353	0.00542406	0.00229584	FALSE
mus-miR-455-5p	268	255	0.0717358	0.389717	3.09871	0.00194367	0.00743405	0.0031466	FALSE
mus-miR-1843a-5p	51	32	0.672425	0.990406	3.09486	0.00196906	0.00745431	0.00315518	FALSE
mus-miR-592	30	71	-1.24286	-0.924876	-3.08908	0.0020078	0.00752417	0.00318475	FALSE
mus-miR-181d-5p	75	142	-0.920928	-0.602947	-3.0116	0.00259876	0.00964141	0.00406477	FALSE
mus-miR-204-5p	158	139	0.18484	0.502821	3.00978	0.00261437	0.00960328	0.00406477	FALSE
mus-miR-100-5p	927	1308	-0.496721	-0.17874	-2.91975	0.00350315	0.0127419	0.00539323	FALSE
mus-miR-148a-3p	69	131	-0.924899	-0.606918	-2.90962	0.00361872	0.0130344	0.00551707	FALSE
mus-miR-34c-3p	144	241	-0.742964	-0.424983	-2.85227	0.00434085	0.0154852	0.00655439	FALSE
mus-miR-125b-2-3p	53	36	0.557995	0.875976	2.84634	0.00442255	0.0156263	0.00661414	FALSE
mus-miR-194-5p	88	70	0.330149	0.64813	2.82309	0.00475636	0.0166473	0.00704627	FALSE
mus-miR-874-3p	1	11	-3.45943	-3.14145	-2.81259	0.00491441	0.0169604	0.00714559	FALSE
mus-miR-141-5p	1	11	-3.45943	-3.14145	-2.81259	0.00491441	0.0169604	0.00714559	FALSE
mus-miR-183-5p	182	294	-0.691878	-0.373897	-2.79643	0.00516713	0.0175872	0.00744411	FALSE
mus-miR-212-3p	142	126	0.172467	0.490448	2.78904	0.00528653	0.01783	0.0075469	FALSE
mus-miR-181b-5p	728	787	-0.112425	0.205556	2.78277	0.00538968	0.0180142	0.00762484	FALSE
mus-miR-493-5p	7	0	3.80735	4.12534	2.77398	0.00553747	0.0183429	0.00776396	FALSE
mus-miR-431	18	7	1.36257	1.68055	2.76807	0.00563898	0.0185138	0.00783633	FALSE
mus-miR-708-5p	5	21	-2.07039	-1.75241	-2.75781	0.005819	0.0189373	0.00801555	FALSE
mus-miR-208a-3p	8	1	3	3.31798	2.74331	0.00608239	0.0196223	0.00823457	FALSE
mus-miR-3559-5p	86	69	0.31774	0.635721	2.74328	0.00608287	0.0194547	0.00823457	FALSE
mus-miR-1843b-5p	29	16	0.857981	1.17596	2.68325	0.00729114	0.0231198	0.00978588	FALSE
mus-miR-17-5p	83	67	0.30895	0.626931	2.66179	0.00777269	0.0244379	0.0103379	FALSE
mus-miR-341	29	64	-1.14202	-0.824038	-2.65914	0.00783413	0.024424	0.0103379	FALSE
mus-miR-342-3p	50	97	-0.956057	-0.638076	-2.618	0.00884458	0.0273445	0.0115472	FALSE
mus-miR-100-3p	194	185	0.0685314	0.386512	2.61596	0.00889757	0.027281	0.0115472	FALSE
mus-miR-221-3p	861	952	-0.144948	0.173033	2.56234	0.0103969	0.0316169	0.0133825	FALSE
mus-miR-15b-5p	447	650	-0.540165	-0.222184	-2.53761	0.0111612	0.033665	0.0142493	FALSE
mus-miR-135a-5p	6	0	3.58496	3.90294	2.52522	0.0115625	0.0345941	0.0146426	FALSE
mus-miR-107-3p	53	39	0.442518	0.760499	2.52106	0.0117	0.0347257	0.0146983	FALSE
mus-miR-486	54	40	0.432959	0.75094	2.51692	0.0118385	0.0348579	0.0147543	FALSE
mus-miR-30e-3p	23	52	-1.17688	-0.858897	-2.48324	0.0130194	0.0380332	0.0160983	FALSE
mus-miR-339-5p	1	9	-3.16993	-2.85194	-2.42845	0.0151634	0.0439502	0.0186028	FALSE
mus-miR-196b-5p	693	763	-0.138828	0.179153	2.37709	0.01745	0.0501857	0.0212421	FALSE
mus-miR-3068-3p	13	5	1.37851	1.69649	2.36816	0.0178768	0.0510177	0.0215942	FALSE
mus-miR-466b-5p	21	47	-1.16227	-0.84429	-2.32656	0.0199888	0.0566095	0.023961	FALSE
mus-miR-151-3p	40	77	-0.944858	-0.626877	-2.29602	0.0216747	0.0609192	0.0257852	FALSE
mus-miR-214-5p	34	23	0.563901	0.881882	2.29273	0.0218635	0.0609877	0.0258142	FALSE
mus-miR-205	19	43	-1.17834	-0.860356	-2.26139	0.0237352	0.0657147	0.027815	FALSE
mus-miR-136-5p	5	0	3.32193	3.63991	2.2501	0.0244423	0.0669231	0.0282224	FALSE
mus-miR-494-3p	5	0	3.32193	3.63991	2.2501	0.0244423	0.0669231	0.0282224	FALSE
mus-miR-374-3p	6	1	2.58496	2.90294	2.23359	0.0255098	0.0688302	0.0290281	FALSE
mus-miR-144-3p	6	1	2.58496	2.90294	2.23359	0.0255098	0.0688302	0.0290281	FALSE
mus-miR-20a-5p	145	139	0.060968	0.378949	2.22012	0.0264105	0.0704913	0.0298368	FALSE
mus-let-7i-3p	3	13	-2.11548	-1.7975	-2.20833	0.0272213	0.0721365	0.0305332	FALSE
mus-miR-222-5p	12	5	1.26303	1.58102	2.16324	0.0305229	0.0803119	0.0338354	FALSE
mus-miR-30a-3p	27	55	-1.02647	-0.708491	-2.16228	0.0305964	0.0799384	0.0338354	FALSE
mus-miR-7a-5p	439	475	-0.113707	0.204274	2.14718	0.0317791	0.0824479	0.0348977	FALSE
mus-miR-142-5p	9	3	1.58496	1.90294	2.13253	0.032963	0.0849254	0.0359463	FALSE
mus-miR-674-5p	11	28	-1.34792	-1.02994	-2.12122	0.0339031	0.0867452	0.0367166	FALSE
mus-miR-200b-3p	42	32	0.392317	0.710298	2.1144	0.0344815	0.0876208	0.0368935	FALSE
mus-miR-328a-5p	0	6	-3.58496	-3.26698	-2.11375	0.0345363	0.0871631	0.0368935	FALSE
mus-miR-340-5p	47	37	0.345135	0.663116	2.10529	0.0352657	0.0884025	0.037418	FALSE
mus-miR-30b-5p	178	178	0	0.317981	2.08608	0.0369716	0.0920569	0.0389597	FALSE
mus-miR-99a-3p	2	10	-2.32193	-2.00395	-2.0834	0.0372148	0.0920447	0.0389597	FALSE
mus-miR-369-5p	19	11	0.788496	1.10648	2.0683	0.0386121	0.0948682	0.0401548	FALSE
mus-miR-127-3p	146	144	0.0198996	0.337881	2.00053	0.0454436	0.110918	0.0469482	FALSE
mus-miR-322-5p	500	699	-0.483364	-0.165383	-1.97828	0.0478969	0.116142	0.0491593	FALSE
mus-miR-411-5p	62	105	-0.760049	-0.442068	-1.95233	0.0508992	0.122621	0.0519015	FALSE
mus-let-7f-1-3p	5	1	2.32193	2.63991	1.9407	0.0522943	0.125169	0.0527603	FALSE
mus-miR-145-3p	81	74	0.130397	0.448378	1.93972	0.0524133	0.12465	0.0527603	FALSE
mus-miR-532-5p	54	93	-0.784271	-0.46629	-1.92992	0.053617	0.1267	0.0536282	FALSE
mus-miR-300-3p	8	3	1.41504	1.73302	1.88575	0.0593281	0.139308	0.058965	FALSE
mus-miR-1249	2	9	-2.16993	-1.85194	-1.87532	0.0607492	0.141748	0.0599976	FALSE
mus-miR-142-3p	13	7	0.893085	1.21107	1.83891	0.065929	0.152873	0.0647064	FALSE
mus-miR-203a-3p	5	15	-1.58496	-1.26698	-1.83302	0.0668	0.15393	0.065154	FALSE
mus-miR-3473	14	8	0.807355	1.12534	1.79978	0.0718959	0.164651	0.0696914	FALSE
mus-miR-22-5p	446	620	-0.475225	-0.157244	-1.7738	0.076096	0.1732	0.0733103	FALSE
mus-miR-10b-3p	1	6	-2.58496	-2.26698	-1.74427	0.0811122	0.183492	0.0776663	FALSE
mus-miR-487b-3p	10	5	1	1.31798	1.72299	0.0848911	0.190876	0.080792	FALSE
mus-miR-1949	16	33	-1.04439	-0.726413	-1.71191	0.0869135	0.194247	0.0822185	FALSE
mus-miR-27a-5p	107	106	0.0135465	0.331528	1.68219	0.0925328	0.205567	0.0870101	FALSE
mus-miR-363-3p	20	14	0.514573	0.832554	1.67431	0.0940687	0.207735	0.0879278	FALSE
mus-miR-582-3p	2	8	-2	-1.68202	-1.65382	0.0981632	0.215494	0.0912121	FALSE
mus-miR-674-3p	12	26	-1.11548	-0.797496	-1.64779	0.099395	0.216915	0.0918133	FALSE
mus-miR-499-5p	205	218	-0.0887042	0.229277	1.63927	0.101158	0.219471	0.0928955	FALSE
mus-miR-296-5p	33	27	0.289507	0.607488	1.63173	0.102736	0.221599	0.093796	FALSE
mus-miR-532-3p	7	3	1.22239	1.54037	1.6211	0.104996	0.224517	0.0947578	FALSE
mus-miR-505-3p	7	3	1.22239	1.54037	1.6211	0.104996	0.224517	0.0947578	FALSE
mus-miR-3588	4	1	2	2.31798	1.61158	0.107053	0.226306	0.0955161	FALSE
mus-miR-378a-5p	4	1	2	2.31798	1.61158	0.107053	0.226306	0.0955161	FALSE
mus-miR-21-3p	81	79	0.0360693	0.35405	1.5569	0.119494	0.250465	0.106014	FALSE
mus-miR-181a-1-3p	16	11	0.540568	0.858549	1.53736	0.124204	0.258875	0.109574	FALSE
mus-miR-99b-3p	54	50	0.111031	0.429012	1.52042	0.128405	0.266135	0.112647	FALSE
mus-miR-24-2-5p	310	344	-0.15014	0.167841	1.49167	0.135785	0.279867	0.118459	FALSE
mus-miR-196b-3p	1	5	-2.32193	-2.00395	-1.47318	0.140702	0.285248	0.118862	FALSE
mus-miR-485-5p	1	5	-2.32193	-2.00395	-1.47318	0.140702	0.285248	0.118862	FALSE
mus-miR-129-2-3p	1	5	-2.32193	-2.00395	-1.47318	0.140702	0.285248	0.118862	FALSE
mus-miR-19a-3p	1	5	-2.32193	-2.00395	-1.47318	0.140702	0.285248	0.118862	FALSE
mus-miR-196a-3p	1	5	-2.32193	-2.00395	-1.47318	0.140702	0.285248	0.118862	FALSE
mus-miR-378a-3p	1703	2225	-0.385727	-0.0677459	-1.47286	0.140788	0.280819	0.118862	FALSE
mus-miR-365-3p	24	43	-0.841302	-0.523321	-1.45825	0.144772	0.287222	0.121572	FALSE
mus-miR-350	76	75	0.0191088	0.33709	1.44006	0.149851	0.295716	0.125168	FALSE
mus-miR-24-1-5p	5	2	1.32193	1.63991	1.43367	0.151668	0.297718	0.126015	FALSE
mus-miR-877	11	7	0.652077	0.970058	1.4127	0.157743	0.308013	0.130373	FALSE
mus-miR-132-5p	106	157	-0.5667	-0.248719	-1.38901	0.164831	0.320168	0.135517	FALSE
mus-miR-184	13	9	0.530515	0.848496	1.37192	0.170089	0.328661	0.139112	FALSE
mus-miR-186-5p	28	48	-0.777608	-0.459627	-1.3682	0.171249	0.329188	0.139335	FALSE
mus-miR-200c-3p	76	76	0	0.317981	1.36293	0.172904	0.330657	0.139957	FALSE
mus-miR-376c-3p	14	10	0.485427	0.803408	1.35863	0.174264	0.331549	0.140334	FALSE
mus-miR-328a-3p	78	118	-0.597241	-0.27926	-1.34487	0.178668	0.338194	0.143147	FALSE
mus-miR-29b-1-5p	6	3	1	1.31798	1.33461	0.182002	0.342756	0.145078	FALSE
mus-miR-361-5p	50	48	0.0588937	0.376875	1.29689	0.19467	0.364761	0.154392	FALSE
mus-miR-664-3p	5	12	-1.26303	-0.945053	-1.29308	0.195984	0.365378	0.154653	FALSE
mus-miR-129-5p	7	4	0.807355	1.12534	1.27263	0.203151	0.376845	0.159507	FALSE
mus-let-7f-2-3p	3	1	1.58496	1.90294	1.23121	0.218243	0.400832	0.168824	FALSE
mus-miR-409a-3p	3	1	1.58496	1.90294	1.23121	0.218243	0.400832	0.168824	FALSE
mus-miR-134-3p	3	1	1.58496	1.90294	1.23121	0.218243	0.400832	0.168824	FALSE
mus-miR-128-3p	42	40	0.0703893	0.38837	1.22242	0.221548	0.402913	0.170541	FALSE
mus-miR-450a-5p	264	362	-0.455452	-0.137471	-1.18871	0.234554	0.424485	0.179573	FALSE
mus-miR-27b-5p	10	7	0.514573	0.832554	1.18391	0.23645	0.425839	0.179573	FALSE
mus-miR-376a-3p	21	18	0.222392	0.540373	1.1714	0.24144	0.432726	0.179573	FALSE
mus-miR-1843b-3p	1	4	-2	-1.68202	-1.16943	0.242231	0.428963	0.179573	FALSE
mus-miR-152-5p	1	4	-2	-1.68202	-1.16943	0.242231	0.428963	0.179573	FALSE
mus-miR-206-3p	1	4	-2	-1.68202	-1.16943	0.242231	0.428963	0.179573	FALSE
mus-miR-3075	1	4	-2	-1.68202	-1.16943	0.242231	0.428963	0.179573	FALSE
mus-miR-421-3p	15	27	-0.847997	-0.530016	-1.16893	0.242431	0.424254	0.179573	FALSE
mus-miR-9a-3p	6	13	-1.11548	-0.797496	-1.16515	0.243957	0.42492	0.179855	FALSE
mus-miR-541-5p	17	14	0.280108	0.598089	1.1549	0.248131	0.430172	0.182078	FALSE
mus-miR-423-5p	120	130	-0.115477	0.202504	1.11277	0.265807	0.458671	0.193539	FALSE
mus-miR-139-5p	149	209	-0.488191	-0.17021	-1.11182	0.266214	0.457248	0.193539	FALSE
mus-miR-421-5p	5	11	-1.1375	-0.819523	-1.09719	0.272558	0.465987	0.197238	FALSE
mus-miR-151-5p	290	393	-0.438476	-0.120495	-1.08886	0.276217	0.470076	0.198969	FALSE
mus-miR-34c-5p	15	26	-0.793549	-0.475568	-1.039	0.298805	0.506194	0.212132	FALSE
mus-miR-1843a-3p	44	44	0	0.317981	1.037	0.299738	0.504321	0.212132	FALSE
mus-miR-503-5p	44	44	0	0.317981	1.037	0.299738	0.504321	0.212132	FALSE
mus-miR-362-3p	9	17	-0.917538	-0.599557	-1.03666	0.299895	0.501175	0.212132	FALSE
mus-miR-345-5p	51	52	-0.0280144	0.289967	1.02304	0.306287	0.509562	0.21551	FALSE
mus-miR-30d-3p	5	3	0.736966	1.05495	1.02066	0.307415	0.509156	0.21551	FALSE
mus-miR-298-3p	6	4	0.584963	0.902943	0.982522	0.325843	0.537278	0.227413	FALSE
mus-miR-139-3p	17	15	0.180572	0.498553	0.979448	0.327359	0.53739	0.22746	FALSE
mus-miR-125a-3p	16	14	0.192645	0.510626	0.971179	0.331459	0.540534	0.228289	FALSE
mus-miR-10a-3p	16	14	0.192645	0.510626	0.971179	0.331459	0.540534	0.228289	FALSE
mus-miR-125b-5p	409	478	-0.22491	0.0930712	0.962632	0.335732	0.543916	0.229664	FALSE
mus-miR-222-3p	1088	1409	-0.372993	-0.0550121	-0.953049	0.340565	0.549346	0.229664	FALSE
mus-miR-675-3p	3	7	-1.22239	-0.904411	-0.951809	0.341194	0.547978	0.229664	FALSE
mus-miR-503-3p	8	6	0.415037	0.733018	0.948539	0.342855	0.545919	0.229664	FALSE
mus-miR-598-3p	8	6	0.415037	0.733018	0.948539	0.342855	0.545919	0.229664	FALSE
mus-miR-219a-5p	8	6	0.415037	0.733018	0.948539	0.342855	0.545919	0.229664	FALSE
mus-miR-28-5p	299	346	-0.210627	0.107354	0.946893	0.343693	0.542597	0.229664	FALSE
mus-miR-133b-3p	9	7	0.36257	0.680551	0.942598	0.345887	0.543746	0.230151	FALSE
mus-miR-32-5p	32	32	0	0.317981	0.88434	0.376513	0.589393	0.249472	FALSE
mus-miR-345-3p	2	5	-1.32193	-1.00395	-0.877685	0.380114	0.591289	0.249751	FALSE
mus-miR-542-3p	2	5	-1.32193	-1.00395	-0.877685	0.380114	0.591289	0.249751	FALSE
mus-miR-425-3p	28	43	-0.61891	-0.300929	-0.871495	0.383484	0.592802	0.250915	FALSE
mus-miR-384-5p	21	20	0.0703893	0.38837	0.864362	0.387389	0.596354	0.252418	FALSE
mus-let-7b-3p	1	3	-1.58496	-1.26698	-0.819743	0.412362	0.630872	0.266479	FALSE
mus-miR-449c-5p	1	3	-1.58496	-1.26698	-0.819743	0.412362	0.630872	0.266479	FALSE
mus-miR-28-3p	58	83	-0.517058	-0.199077	-0.815288	0.414907	0.630863	0.267025	FALSE
mus-miR-187-3p	33	34	-0.0430687	0.274912	0.782233	0.434078	0.657317	0.272632	FALSE
mus-miR-29c-5p	15	14	0.0995357	0.417517	0.781381	0.434579	0.655401	0.272632	FALSE
mus-miR-29a-5p	36	53	-0.557995	-0.240014	-0.779886	0.435458	0.654068	0.272632	FALSE
mus-let-7d-3p	71	78	-0.135655	0.182326	0.773307	0.439341	0.65724	0.272632	FALSE
mus-miR-6324	20	31	-0.632268	-0.314287	-0.771017	0.440697	0.65662	0.272632	FALSE
mus-miR-671	2	1	1	1.31798	0.770538	0.440981	0.649222	0.272632	FALSE
mus-miR-323-3p	2	1	1	1.31798	0.770538	0.440981	0.649222	0.272632	FALSE
mus-miR-664-2-5p	2	1	1	1.31798	0.770538	0.440981	0.649222	0.272632	FALSE
mus-miR-3559-3p	2	1	1	1.31798	0.770538	0.440981	0.649222	0.272632	FALSE
mus-miR-543-3p	2	1	1	1.31798	0.770538	0.440981	0.649222	0.272632	FALSE
mus-miR-501-3p	21	21	0	0.317981	0.716388	0.473752	0.689263	0.287363	FALSE
mus-miR-33-5p	78	87	-0.157541	0.16044	0.715953	0.47402	0.686959	0.287363	FALSE
mus-miR-351-3p	3	2	0.584963	0.902943	0.694746	0.487214	0.695218	0.287363	FALSE
mus-miR-3084b-5p	3	2	0.584963	0.902943	0.694746	0.487214	0.695218	0.287363	FALSE
mus-miR-3084c-5p	3	2	0.584963	0.902943	0.694746	0.487214	0.695218	0.287363	FALSE
mus-miR-30c-1-3p	3	2	0.584963	0.902943	0.694746	0.487214	0.695218	0.287363	FALSE
mus-miR-201-5p	3	2	0.584963	0.902943	0.694746	0.487214	0.695218	0.287363	FALSE
mus-miR-452-5p	3	2	0.584963	0.902943	0.694746	0.487214	0.695218	0.287363	FALSE
mus-miR-33-3p	3	2	0.584963	0.902943	0.694746	0.487214	0.695218	0.287363	FALSE
mus-miR-324-3p	3	6	-1	-0.682019	-0.690626	0.4898	0.687017	0.287363	FALSE
mus-miR-212-5p	3	6	-1	-0.682019	-0.690626	0.4898	0.687017	0.287363	FALSE
mus-miR-101b-3p	47	51	-0.117836	0.200145	0.688514	0.491129	0.684996	0.287363	FALSE
mus-miR-505-5p	8	7	0.192645	0.510626	0.686721	0.492259	0.681448	0.287363	FALSE
mus-miR-335	8	7	0.192645	0.510626	0.686721	0.492259	0.681448	0.287363	FALSE
mus-miR-208a-5p	8	7	0.192645	0.510626	0.686721	0.492259	0.681448	0.287363	FALSE
mus-miR-496-3p	7	6	0.222392	0.540373	0.676295	0.498853	0.685462	0.287695	FALSE
mus-miR-652-5p	5	9	-0.847997	-0.530016	-0.674873	0.499757	0.684169	0.287695	FALSE
mus-miR-30c-2-3p	4	3	0.415037	0.733018	0.670716	0.502402	0.684004	0.287695	FALSE
mus-miR-342-5p	4	3	0.415037	0.733018	0.670716	0.502402	0.684004	0.287695	FALSE
mus-miR-365-5p	6	5	0.263034	0.581015	0.668494	0.503819	0.680935	0.287695	FALSE
mus-miR-190a-5p	6	5	0.263034	0.581015	0.668494	0.503819	0.680935	0.287695	FALSE
mus-miR-338-5p	5	4	0.321928	0.639909	0.66528	0.505871	0.679994	0.28782	FALSE
mus-miR-140-3p	160	186	-0.217231	0.10075	0.650685	0.51525	0.6901	0.292098	FALSE
mus-miR-138-5p	106	143	-0.431951	-0.11397	-0.621786	0.534082	0.71275	0.301685	FALSE
mus-miR-351-5p	51	71	-0.477322	-0.159341	-0.607704	0.543384	0.722564	0.305839	FALSE
mus-miR-702-3p	22	23	-0.0641303	0.253851	0.591908	0.553912	0.733934	0.310651	FALSE
mus-miR-25-5p	6	10	-0.736966	-0.418985	-0.573279	0.566456	0.747883	0.316555	FALSE
mus-miR-6329	2	4	-1	-0.682019	-0.563893	0.572827	0.752279	0.317854	FALSE
mus-miR-181c-3p	2	4	-1	-0.682019	-0.563893	0.572827	0.752279	0.317854	FALSE
mus-miR-34b-5p	4	7	-0.807355	-0.489374	-0.553426	0.579972	0.757639	0.320685	FALSE
mus-miR-210-3p	94	109	-0.213595	0.104386	0.516366	0.605598	0.78834	0.33368	FALSE
mus-miR-146b-5p	75	101	-0.429393	-0.111412	-0.511033	0.609328	0.790422	0.334561	FALSE
mus-miR-106b-5p	78	90	-0.206451	0.11153	0.501934	0.615714	0.795923	0.33689	FALSE
mus-miR-34b-3p	91	106	-0.220126	0.0978552	0.476813	0.633495	0.816065	0.345415	FALSE
mus-miR-322-3p	108	127	-0.233797	0.0841838	0.447943	0.654194	0.839813	0.352855	FALSE
mus-miR-18a-3p	5	8	-0.678072	-0.360091	-0.445202	0.656174	0.838005	0.352855	FALSE
mus-miR-221-5p	5	8	-0.678072	-0.360091	-0.445202	0.656174	0.838005	0.352855	FALSE
mus-miR-125b-1-3p	103	121	-0.232363	0.0856183	0.444792	0.65647	0.834077	0.352855	FALSE
mus-miR-9a-5p	8	8	0	0.317981	0.442157	0.658375	0.833643	0.352855	FALSE
mus-miR-450b-3p	38	43	-0.178337	0.139644	0.436498	0.662476	0.835981	0.353845	FALSE
mus-miR-188-5p	7	7	0	0.317981	0.4136	0.679167	0.854139	0.355301	FALSE
mus-miR-190b-5p	3	5	-0.736966	-0.418985	-0.405368	0.685207	0.857376	0.355301	FALSE
mus-miR-326-3p	3	5	-0.736966	-0.418985	-0.405368	0.685207	0.857376	0.355301	FALSE
mus-miR-30b-3p	1	2	-1	-0.682019	-0.398732	0.690091	0.849166	0.355301	FALSE
mus-miR-6319	1	2	-1	-0.682019	-0.398732	0.690091	0.849166	0.355301	FALSE
mus-miR-3084a-5p	1	2	-1	-0.682019	-0.398732	0.690091	0.849166	0.355301	FALSE
mus-miR-219b	1	2	-1	-0.682019	-0.398732	0.690091	0.849166	0.355301	FALSE
mus-miR-361-3p	1	2	-1	-0.682019	-0.398732	0.690091	0.849166	0.355301	FALSE
mus-miR-485-3p	1	2	-1	-0.682019	-0.398732	0.690091	0.849166	0.355301	FALSE
mus-miR-130a-5p	1	2	-1	-0.682019	-0.398732	0.690091	0.849166	0.355301	FALSE
mus-miR-218a-1-3p	1	2	-1	-0.682019	-0.398732	0.690091	0.849166	0.355301	FALSE
mus-miR-384-3p	14	20	-0.514573	-0.196592	-0.395358	0.692578	0.839695	0.355417	FALSE
mus-miR-193b-3p	78	103	-0.401098	-0.0831173	-0.386899	0.698831	0.844516	0.356165	FALSE
mus-miR-92b-3p	6	6	0	0.317981	0.382918	0.70178	0.845326	0.356165	FALSE
mus-miR-25-3p	675	825	-0.289507	0.0284744	0.382745	0.701909	0.842745	0.356165	FALSE
mus-let-7e-3p	13	14	-0.106915	0.211066	0.381127	0.703109	0.841463	0.356165	FALSE
mus-miR-15b-3p	6	9	-0.584963	-0.266982	-0.355803	0.721988	0.861278	0.359973	FALSE
mus-miR-18a-5p	44	51	-0.212994	0.104987	0.355258	0.722397	0.859004	0.359973	FALSE
mus-miR-672-5p	5	5	0	0.317981	0.349555	0.726673	0.855859	0.359973	FALSE
mus-miR-146a-3p	5	5	0	0.317981	0.349555	0.726673	0.855859	0.359973	FALSE
mus-miR-3084a-3p	5	5	0	0.317981	0.349555	0.726673	0.855859	0.359973	FALSE
mus-miR-3084b-3p	5	5	0	0.317981	0.349555	0.726673	0.855859	0.359973	FALSE
mus-miR-3084d	5	5	0	0.317981	0.349555	0.726673	0.855859	0.359973	FALSE
mus-miR-103-3p	127	152	-0.259243	0.0587382	0.340433	0.733531	0.855786	0.362228	FALSE
mus-let-7c-2-3p	22	30	-0.447459	-0.129478	-0.322643	0.746966	0.868728	0.367706	FALSE
mus-miR-500-3p	152	196	-0.366782	-0.0488013	-0.315263	0.752562	0.872502	0.369123	FALSE
mus-miR-452-3p	4	4	0	0.317981	0.312651	0.754546	0.872076	0.369123	FALSE
mus-miR-455-3p	16	22	-0.459432	-0.141451	-0.301215	0.76325	0.879397	0.372222	FALSE
mus-miR-330-5p	4	6	-0.584963	-0.266982	-0.290511	0.771425	0.884695	0.373886	FALSE
mus-miR-1306-5p	4	6	-0.584963	-0.266982	-0.290511	0.771425	0.884695	0.373886	FALSE
mus-miR-1839-3p	44	58	-0.398549	-0.0805684	-0.281538	0.778298	0.888457	0.376056	FALSE
mus-miR-223-3p	35	41	-0.228269	0.089712	0.271462	0.786035	0.894537	0.376579	FALSE
mus-miR-130b-5p	3	3	0	0.317981	0.270763	0.786573	0.891049	0.376579	FALSE
mus-miR-148b-3p	3	3	0	0.317981	0.270763	0.786573	0.891049	0.376579	FALSE
mus-miR-339-3p	45	59	-0.39079	-0.072809	-0.256953	0.797215	0.898987	0.380513	FALSE
mus-miR-132-3p	11	15	-0.447459	-0.129478	-0.228139	0.819538	0.921359	0.385226	FALSE
mus-miR-378b	2	2	0	0.317981	0.221077	0.825032	0.920563	0.385226	FALSE
mus-miR-20b-5p	2	2	0	0.317981	0.221077	0.825032	0.920563	0.385226	FALSE
mus-miR-411-3p	2	2	0	0.317981	0.221077	0.825032	0.920563	0.385226	FALSE
mus-miR-337-3p	2	2	0	0.317981	0.221077	0.825032	0.920563	0.385226	FALSE
mus-miR-324-5p	8	9	-0.169925	0.148056	0.212026	0.832086	0.920131	0.385226	FALSE
mus-miR-101a-3p	8	9	-0.169925	0.148056	0.212026	0.832086	0.920131	0.385226	FALSE
mus-miR-143-5p	2	3	-0.584963	-0.266982	-0.205422	0.837243	0.920347	0.385226	FALSE
mus-miR-93-3p	2	3	-0.584963	-0.266982	-0.205422	0.837243	0.920347	0.385226	FALSE
mus-miR-615	22	26	-0.241008	0.0769729	0.185066	0.853178	0.933714	0.385226	FALSE
mus-miR-497-5p	92	112	-0.283793	0.034188	0.169358	0.865515	0.94443	0.385226	FALSE
mus-let-7a-1-3p	23	30	-0.383329	-0.0653476	-0.164658	0.869213	0.945684	0.385226	FALSE
mus-miR-138-2-3p	1	1	0	0.317981	0.156325	0.875777	0.929652	0.385226	FALSE
mus-miR-376b-5p	1	1	0	0.317981	0.156325	0.875777	0.929652	0.385226	FALSE
mus-miR-26b-3p	1	1	0	0.317981	0.156325	0.875777	0.929652	0.385226	FALSE
mus-miR-493-3p	1	1	0	0.317981	0.156325	0.875777	0.929652	0.385226	FALSE
mus-miR-1193-3p	1	1	0	0.317981	0.156325	0.875777	0.929652	0.385226	FALSE
mus-miR-192-3p	1	1	0	0.317981	0.156325	0.875777	0.929652	0.385226	FALSE
mus-miR-211-3p	1	1	0	0.317981	0.156325	0.875777	0.929652	0.385226	FALSE
mus-miR-3099	1	1	0	0.317981	0.156325	0.875777	0.929652	0.385226	FALSE
mus-miR-483-5p	1	1	0	0.317981	0.156325	0.875777	0.929652	0.385226	FALSE
mus-miR-138-1-3p	1	1	0	0.317981	0.156325	0.875777	0.929652	0.385226	FALSE
mus-miR-200b-5p	1	1	0	0.317981	0.156325	0.875777	0.929652	0.385226	FALSE
mus-miR-376b-3p	1	1	0	0.317981	0.156325	0.875777	0.929652	0.385226	FALSE
mus-miR-1224	1	1	0	0.317981	0.156325	0.875777	0.929652	0.385226	FALSE
mus-miR-379-3p	1	1	0	0.317981	0.156325	0.875777	0.929652	0.385226	FALSE
mus-miR-434-5p	1	1	0	0.317981	0.156325	0.875777	0.929652	0.385226	FALSE
mus-miR-495	1	1	0	0.317981	0.156325	0.875777	0.929652	0.385226	FALSE
mus-miR-298-5p	43	52	-0.274175	0.043806	0.148099	0.882264	0.914302	0.386996	FALSE
mus-miR-449a-5p	97	123	-0.342602	-0.0246207	-0.126518	0.899322	0.929383	0.393379	FALSE
mus-miR-191a-3p	44	56	-0.347923	-0.0299423	-0.103716	0.917394	0.945426	0.400169	FALSE
mus-miR-154-5p	10	12	-0.263034	0.0549466	0.0894063	0.928759	0.954486	0.401985	FALSE
mus-miR-1247-5p	3	4	-0.415037	-0.0970565	-0.0888072	0.929235	0.951024	0.401985	FALSE
mus-miR-136-3p	3	4	-0.415037	-0.0970565	-0.0888072	0.929235	0.951024	0.401985	FALSE
mus-miR-296-3p	22	28	-0.347923	-0.0299423	-0.0733364	0.941538	0.959645	0.406188	FALSE
mus-miR-196c-5p	5	6	-0.263034	0.0549466	0.0632194	0.949592	0.965202	0.40854	FALSE
mus-miR-195-5p	13	16	-0.29956	0.0184207	0.0343919	0.972565	0.985851	0.41728	FALSE
mus-miR-193a-5p	44	55	-0.321928	-0.0039471	-0.0136108	0.98914	0.999921	0.421883	FALSE
mus-miR-330-3p	16	20	-0.321928	-0.0039471	-0.00820732	0.993452	1	0.421883	FALSE
mus-miR-484	12	15	-0.321928	-0.0039471	-0.00710771	0.994329	0.999718	0.421883	FALSE
mus-miR-760-3p	8	10	-0.321928	-0.0039471	-0.00580339	0.99537	0.99806	0.421883	FALSE
mus-miR-134-5p	4	5	-0.321928	-0.0039471	-0.00410359	0.996726	0.996726	0.421883	FALSE
mus-miR-219a-1-3p	0	2	NA	NA	NA	NA	NA	NA	FALSE
mus-miR-337-5p	0	4	NA	NA	NA	NA	NA	NA	FALSE
mus-miR-218a-2-3p	0	2	NA	NA	NA	NA	NA	NA	FALSE
mus-miR-146b-3p	0	1	NA	NA	NA	NA	NA	NA	FALSE
mus-miR-155-3p	0	1	NA	NA	NA	NA	NA	NA	FALSE
mus-miR-325-3p	0	1	NA	NA	NA	NA	NA	NA	FALSE
mus-miR-433-3p	0	1	NA	NA	NA	NA	NA	NA	FALSE
mus-miR-760-5p	0	1	NA	NA	NA	NA	NA	NA	FALSE
mus-miR-92a-1-5p	0	1	NA	NA	NA	NA	NA	NA	FALSE
mus-miR-224-3p	0	3	NA	NA	NA	NA	NA	NA	FALSE
mus-miR-3583-5p	0	3	NA	NA	NA	NA	NA	NA	FALSE
mus-miR-466b-2-3p	0	2	NA	NA	NA	NA	NA	NA	FALSE
mus-miR-466b-4-3p	0	2	NA	NA	NA	NA	NA	NA	FALSE
mus-miR-103-2-5p	0	2	NA	NA	NA	NA	NA	NA	FALSE
mus-miR-128-1-5p	0	1	NA	NA	NA	NA	NA	NA	FALSE
mus-miR-1956-3p	0	1	NA	NA	NA	NA	NA	NA	FALSE
mus-miR-200a-5p	0	1	NA	NA	NA	NA	NA	NA	FALSE
mus-miR-203b-3p	0	1	NA	NA	NA	NA	NA	NA	FALSE
mus-miR-3558-3p	0	1	NA	NA	NA	NA	NA	NA	FALSE
mus-miR-3569	0	1	NA	NA	NA	NA	NA	NA	FALSE
mus-miR-3585-5p	0	1	NA	NA	NA	NA	NA	NA	FALSE
mus-miR-370-3p	0	1	NA	NA	NA	NA	NA	NA	FALSE
mus-miR-15a-3p	0	2	NA	NA	NA	NA	NA	NA	FALSE
mus-miR-181a-2-3p	0	1	NA	NA	NA	NA	NA	NA	FALSE
mus-miR-183-3p	0	1	NA	NA	NA	NA	NA	NA	FALSE
mus-miR-203a-5p	0	1	NA	NA	NA	NA	NA	NA	FALSE
mus-miR-216a-5p	0	1	NA	NA	NA	NA	NA	NA	FALSE
mus-miR-3558-5p	0	1	NA	NA	NA	NA	NA	NA	FALSE
mus-miR-3586-3p	0	1	NA	NA	NA	NA	NA	NA	FALSE
mus-miR-377-3p	0	1	NA	NA	NA	NA	NA	NA	FALSE
mus-miR-450a-3p	0	1	NA	NA	NA	NA	NA	NA	FALSE
mus-miR-741-3p	0	1	NA	NA	NA	NA	NA	NA	FALSE
mus-miR-106b-3p	3	0	NA	NA	NA	NA	NA	NA	FALSE
mus-miR-23b-5p	2	0	NA	NA	NA	NA	NA	NA	FALSE
mus-miR-3074	2	0	NA	NA	NA	NA	NA	NA	FALSE
mus-miR-338-3p	2	0	NA	NA	NA	NA	NA	NA	FALSE
mus-miR-130b-3p	3	0	NA	NA	NA	NA	NA	NA	FALSE
mus-miR-135b-5p	3	0	NA	NA	NA	NA	NA	NA	FALSE
mus-miR-124-3p	2	0	NA	NA	NA	NA	NA	NA	FALSE
mus-miR-204-3p	2	0	NA	NA	NA	NA	NA	NA	FALSE
mus-miR-340-3p	2	0	NA	NA	NA	NA	NA	NA	FALSE
mus-miR-3585-3p	2	0	NA	NA	NA	NA	NA	NA	FALSE
mus-miR-5132-3p	2	0	NA	NA	NA	NA	NA	NA	FALSE
mus-miR-770-5p	4	0	NA	NA	NA	NA	NA	NA	FALSE
mus-miR-211-5p	2	0	NA	NA	NA	NA	NA	NA	FALSE
mus-miR-3064-5p	2	0	NA	NA	NA	NA	NA	NA	FALSE
mus-miR-150-3p	1	0	NA	NA	NA	NA	NA	NA	FALSE
mus-miR-153-3p	1	0	NA	NA	NA	NA	NA	NA	FALSE
mus-miR-32-3p	1	0	NA	NA	NA	NA	NA	NA	FALSE
mus-miR-3593-5p	1	0	NA	NA	NA	NA	NA	NA	FALSE
mus-miR-383-5p	1	0	NA	NA	NA	NA	NA	NA	FALSE
mus-miR-412-5p	1	0	NA	NA	NA	NA	NA	NA	FALSE
mus-miR-500-5p	1	0	NA	NA	NA	NA	NA	NA	FALSE
mus-miR-23a-5p	2	0	NA	NA	NA	NA	NA	NA	FALSE
mus-miR-299a-3p	2	0	NA	NA	NA	NA	NA	NA	FALSE
mus-let-7g-3p	1	0	NA	NA	NA	NA	NA	NA	FALSE
mus-miR-137-5p	1	0	NA	NA	NA	NA	NA	NA	FALSE
mus-miR-17-1-3p	1	0	NA	NA	NA	NA	NA	NA	FALSE
mus-miR-190b-3p	1	0	NA	NA	NA	NA	NA	NA	FALSE
mus-miR-329-3p	1	0	NA	NA	NA	NA	NA	NA	FALSE
mus-miR-331-3p	1	0	NA	NA	NA	NA	NA	NA	FALSE
mus-miR-466c-3p	1	0	NA	NA	NA	NA	NA	NA	FALSE
mus-miR-466d	1	0	NA	NA	NA	NA	NA	NA	FALSE
mus-miR-673-5p	1	0	NA	NA	NA	NA	NA	NA	FALSE
mus-miR-1306-3p	2	0	NA	NA	NA	NA	NA	NA	FALSE
mus-miR-34a-3p	2	0	NA	NA	NA	NA	NA	NA	FALSE
mus-miR-107-5p	1	0	NA	NA	NA	NA	NA	NA	FALSE
mus-miR-1188-5p	1	0	NA	NA	NA	NA	NA	NA	FALSE
mus-miR-1247-3p	1	0	NA	NA	NA	NA	NA	NA	FALSE
mus-miR-126b	1	0	NA	NA	NA	NA	NA	NA	FALSE
mus-miR-148b-5p	1	0	NA	NA	NA	NA	NA	NA	FALSE
mus-miR-195-3p	1	0	NA	NA	NA	NA	NA	NA	FALSE
mus-miR-196c-3p	1	0	NA	NA	NA	NA	NA	NA	FALSE
mus-miR-210-5p	1	0	NA	NA	NA	NA	NA	NA	FALSE
mus-miR-26a-3p	1	0	NA	NA	NA	NA	NA	NA	FALSE
mus-miR-344a-3p	1	0	NA	NA	NA	NA	NA	NA	FALSE
mus-miR-362-5p	1	0	NA	NA	NA	NA	NA	NA	FALSE
mus-miR-376c-5p	1	0	NA	NA	NA	NA	NA	NA	FALSE
mus-miR-511-3p	1	0	NA	NA	NA	NA	NA	NA	FALSE
mus-miR-540-3p	1	0	NA	NA	NA	NA	NA	NA	FALSE
mus-miR-598-5p	1	0	NA	NA	NA	NA	NA	NA	FALSE
mus-miR-666-3p	1	0	NA	NA	NA	NA	NA	NA	FALSE
